# Supplementary material for: B-1 derived anti-Thy-1 B cells in old aged mice develop lymphoma/leukemia with high expression of CD11b and Hamp2 that different from TCL1 transgenic mice
Source: PubMed Central journal article supplement (PMC10988983; doi:10.1186/s12979-024-00415-6), 2024-04-03
Supplement: 12979_2024_415_MOESM1_ESM.pdf [file 12979_2024_415_MOESM1_ESM.pdf]

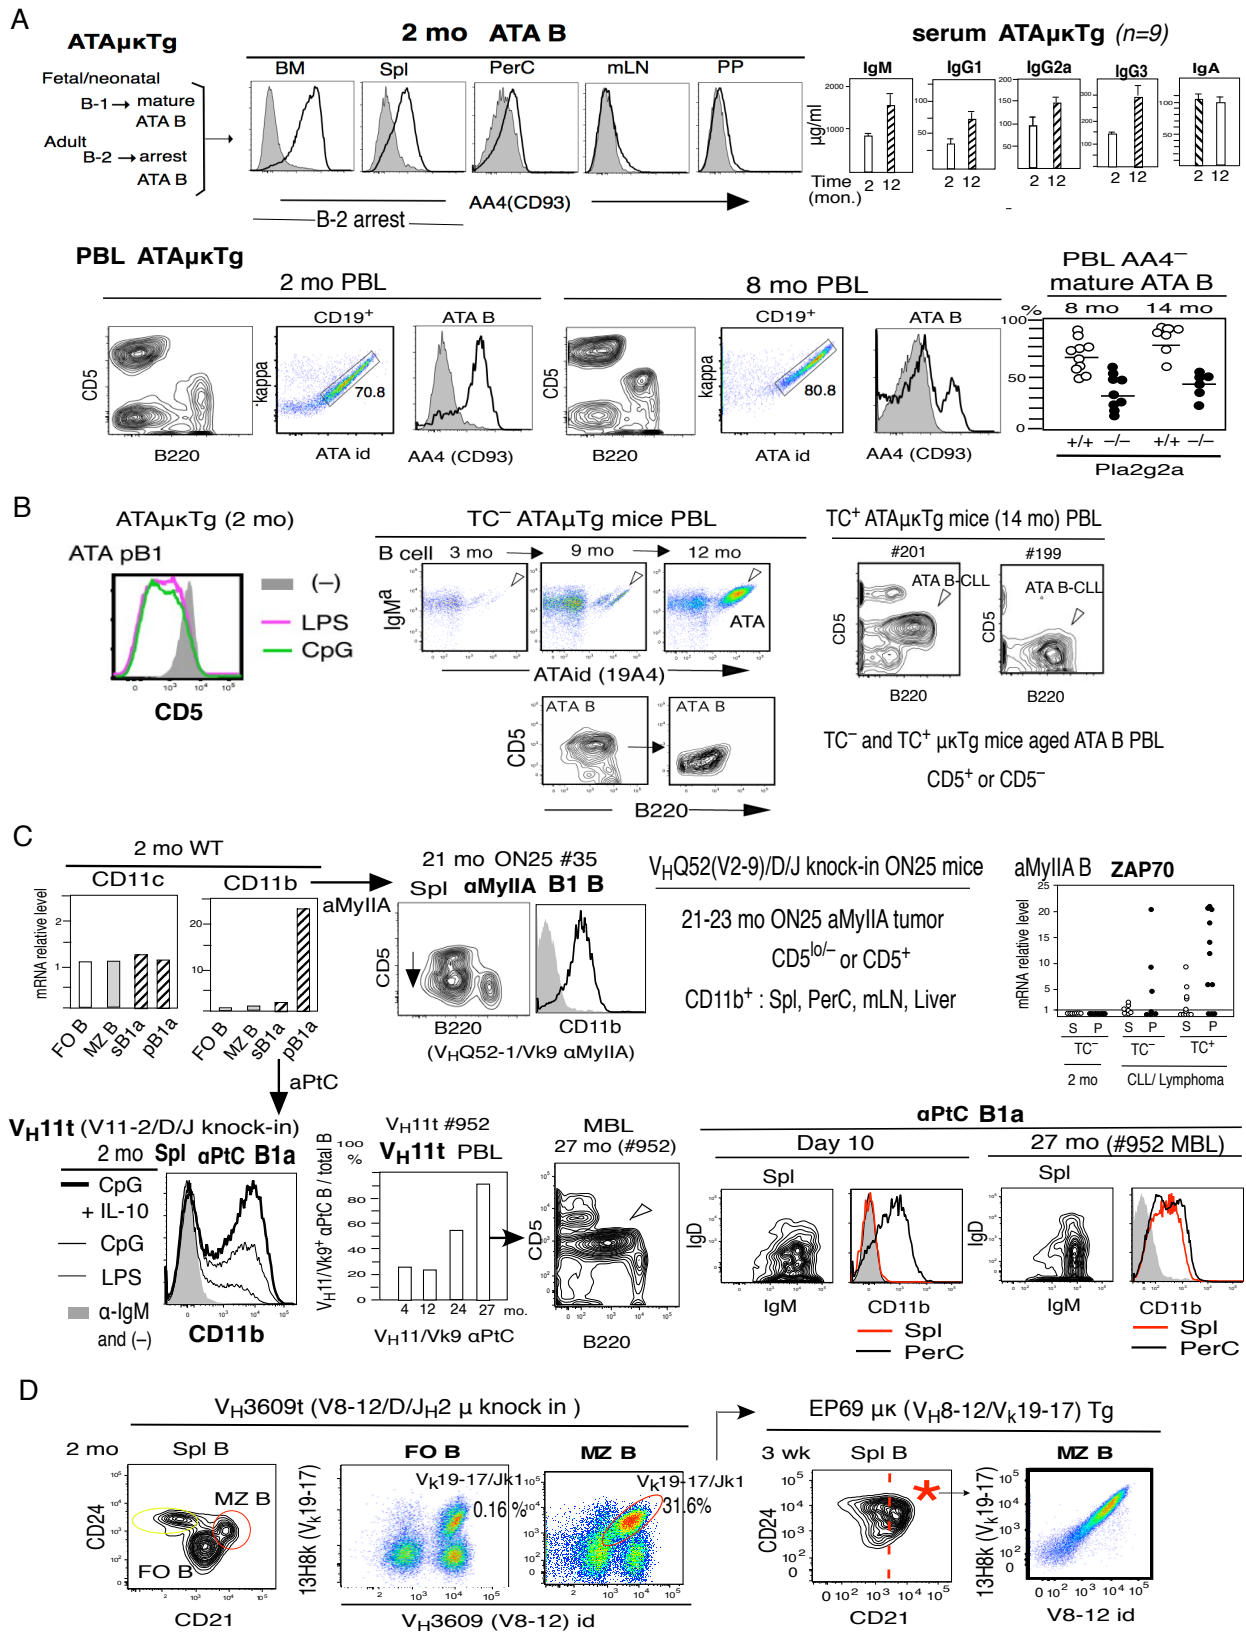

Figure S1

**Figure S1. Summary. In age, ATA B increased in PBL and CD5 can decrease, and increase of CD11b in ATA B, aMyIIA, and aPtC. V8-12 generation in MZ B cell.**

**(A)** 2 mo ATA $\mu$ kTg mice with ATA B (V<sub>H</sub>8-12/V<sub>k</sub>21-5) show BM and most Spl with immature AA4<sup>+</sup>, different most mature in PerC, mLN, and intestinal PP. In PBL, 2 mo ATA B cells are immature, then, 8 mo B1a cells increase with higher mature (AA4<sup>-</sup>) ATA B cells (1), and further increase mature ATA B in 14 mo, contrast low ATA B cells in originally Pla2g2a negative ATA $\mu$ kTg mice (1). Serum IgM, IgG1, IgG2, IgG3 also increase from 2 mo to 12 mo, and IgA originally 2 mo high. **(B)** Summary (2). Left: CD5 down-regulation after stimulation of ATA B pB1 cells in ATA $\mu$ kTg mice by cell proliferation by LPS or CpG in 3 days. Middle: Increased ATA B cell frequency in PBL B cells in ATA $\mu$ Tg mouse at 12 mo, with further B220 down and CD5 reduction. Right: CD5 down-regulation occurrence at CLL stage also in TC<sup>+</sup>ATA $\mu$ kTg mice and CD5<sup>+</sup> and CD5<sup>-</sup> CLL in PBL found in two littermates at 14 mo. **(C)** Middle: aMyIIA B1 B cells showed CD5 down and CD11b<sup>+</sup> in old aged, summary of aMyIIA B (3). Right: ZAP70 expression determined by quantitative PCR in aMyIIA B cells from the spleen (s) and peritoneal cavity (p), after the tumor stage. Relative messenger RNA transcript levels with FO B was set to 1.0. Down: Summary of V<sub>H</sub>11t (4). Left: Three days after indicated CD11b stimulation, LPS (low), CpG, CpG+IL-10 (high), of spleen B1a cells from an adult 2 mo V<sub>H</sub>11t mice. Middle: In PBL, 12 mo aPtC B cells are 22 % and increased 27 mo 86.7% (#952) in aPtC (V<sub>H</sub>11/V<sub>k</sub>9) in CD19<sup>+</sup>B cells as high MBL. Right: Comparison of CD11b expression levels by aPtC B1a cells in Spl between day 10 neonate as CD11b<sup>-</sup>, and 27 mo as CD11b<sup>+</sup>. **(D)** Summary about AGcA  $\mu$ Tg and AGcA  $\mu$ kTg mice with MZ B (5). Left: Analysis of B cell subsets in the spleen. In FO B and MZ B cells, V<sub>H</sub>3609 (V8-12) id<sup>+</sup> cells marked by a vertical line. The majority of 13H8K (V<sub>k</sub>19-17/Jk1)<sup>hi/med</sup> Igk B cells are present in low FOB, and MZ B cells are higher. Right: AGcA  $\mu$ kTg mice, as EP69. 3 wk of EP69  $\mu$ kTg mice showed dominantly in MZ B cells with the V<sub>H</sub>8-12/V<sub>k</sub>19-17.

1. Susan A. Shinton, Joni Brill-Dashoff, Kyoko Hayakawa. (2022). Pla2g2a promotes innate Th2-type immunity lymphocytes to increase B1a cells. *Scientific Reports* 12:14899
2. Hayakawa K, Formica AM, Brill-Dashoff J, Shinton SA, Ichikawa D, Zhou Y, Morse III HC, Hardy RR. (2016). Early generated B1 B cells with restricted BCRs become chronic lymphocytic leukemia with continued c-Myc and low Bmf expression. *J. Exp. Med.* 213:3007.
3. Hayakawa, K., Formica, A.M., Colombo, M.J., Shinton, S.A., Brill-Dashoff, J., Morse III, H.C., Li, Y.S., Hardy, R.R. (2016). Loss of a chromosomal region with syntheny to human 13q14 occurs in mouse chronic lymphocytic leukemia that originates from early-generated B-1 B cells. *Leukemia* 30:1510.
4. Hayakawa K, Formica A.M, Nakao Y, Ichikawa D, Shinton, S.A, Brill-Dashoff J, Smith, M.R, Morse III, H.C, Hardy, R.R. (2018). Early generated B-1 derived B cells have the capacity to progress to become mantle cell lymphoma-like neoplasia in aged mice. *J. Immunol.* 201: 804.
5. Ichikawa, D., Asano, A., Shinton, S.A., Brill-Dashoff, J., Formica, A.M., Velcich, A., Hardy, R.R., and Hayakawa K. (2015). Natural anti-intestinal goblet cell autoantibody production from Marginal zone B cells. *J. Immunol.* 194:606.
