# Supplementary material for: B-1 derived anti-Thy-1 B cells in old aged mice develop lymphoma/leukemia with high expression of CD11b and Hamp2 that different from TCL1 transgenic mice
Source: PubMed Central journal article supplement (PMC10988983; doi:10.1186/s12979-024-00415-6), 2024-04-03
Supplement: 12979_2024_415_MOESM2_ESM.pdf [file 12979_2024_415_MOESM2_ESM.pdf]

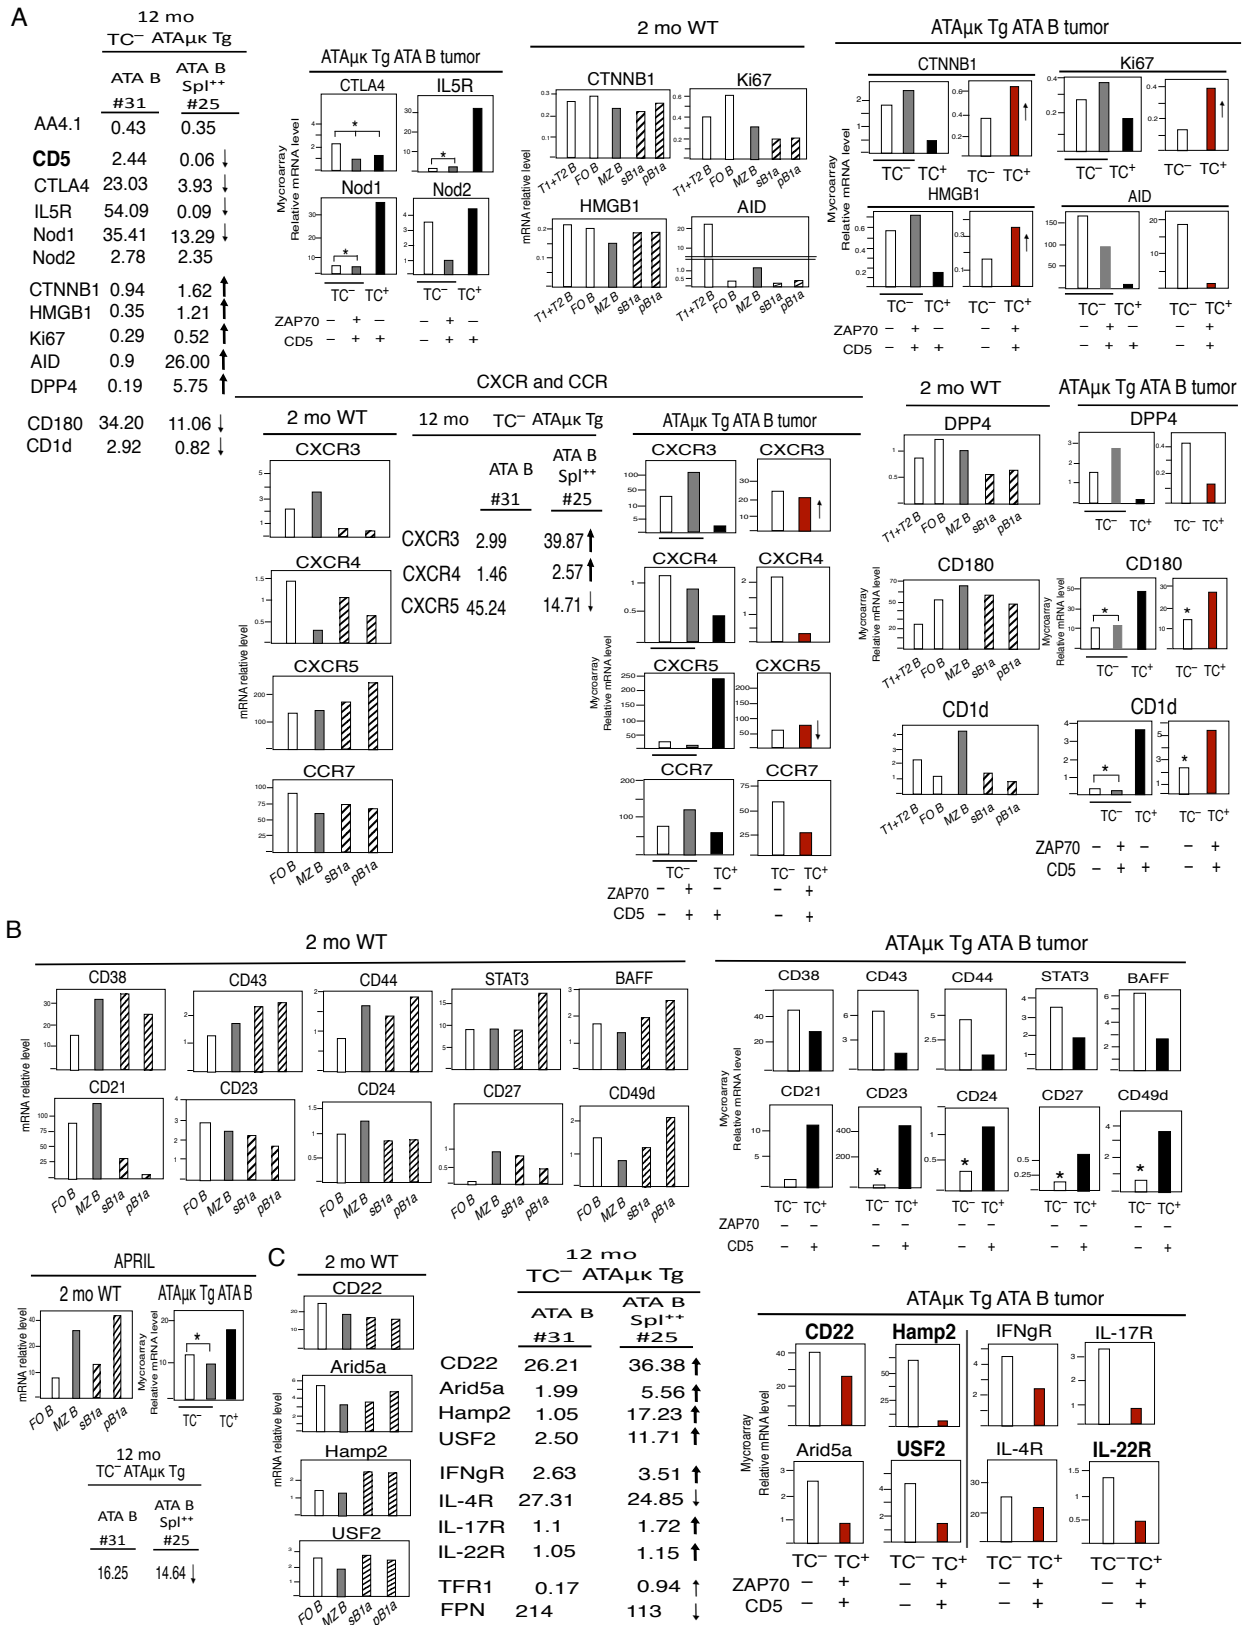

Figure S2

**Figure S2. 2 mo wild time (WT) B1a cells versus ATA $\mu$ k Tg ATA B tumor.**

2 mo WT B cells: spleen-immature B (T1+T2 B), FO B, MZ B, and spleen B1a (sB1a,) and PerC B1a (pB1a) in mRNA. ATA B tumor for mycloarray analysis mRNA: as listed Figure 4A, TC<sup>-</sup>ZAP70<sup>-</sup>CD5<sup>-</sup> (16 mo) and TC<sup>-</sup>ZAP70<sup>+</sup>CD5<sup>+</sup> (22 mo), versus middle aged ATA B tumor TC<sup>+</sup>ZAP70<sup>-</sup>CD5<sup>+</sup> (10 mo). Figure 4B, TC<sup>-</sup>ZAP70<sup>-</sup>CD5<sup>-</sup> (17 mo) versus TC<sup>+</sup>ZAP70<sup>+</sup>CD5<sup>+</sup> (15 mo). As in Figure 5A, 12 mo TC<sup>-</sup>ATA $\mu$ kTg mice ATA B with normal CD5<sup>+</sup>B #31, and CD5<sup>-</sup>B with spleen increased #25. **(A)** 12 mo ATA B for TC<sup>-</sup> cells, CD5<sup>+</sup> #31 showed slightly AA4.1 (immature) present, however most mature B1a, and #25 is the mature CD5<sup>-</sup> B cell with Spl<sup>++</sup>. This 12 mo CD5<sup>-</sup> ATA B cell is similar to old aged TC<sup>-</sup>ATA B tumors, down IL5R and Nod1, increase CTNNB1, HMGB1, Ki67, AID and DPP4, down CD180 and CD1d, as TC<sup>-</sup> compared to middle aged TC<sup>+</sup>ZAP70<sup>-</sup>CD5<sup>+</sup>. However, both TC<sup>-</sup> and TC<sup>+</sup>ZAP70<sup>-</sup> cells are CTLA4 down. Nod2 is TC<sup>-</sup>ZAP70<sup>+</sup>CD5<sup>+</sup> cells are down. CTNNB1, HMGB1, Ki67 are higher in TC<sup>-</sup>ZAP70<sup>+</sup>CD5<sup>+</sup> than TC<sup>-</sup>ZAP70<sup>-</sup>CD5<sup>-</sup> and similar to high TC<sup>+</sup>ZAP<sup>+</sup>CD5<sup>+</sup>. AID was originally (in 2 mo) all mature B cells were low, then, old aged TC<sup>-</sup>ZAP<sup>-</sup>CD5<sup>-</sup>ATA B tumor more increased than TC<sup>-</sup>ZAP70<sup>+</sup>CD5<sup>+</sup> cells and TC<sup>+</sup> cells are negative. Down: **For CXCR**. CXCR5 was originally high in B1a cells, then, 12 mo CD5<sup>-</sup> spl<sup>++</sup> cell showed down CXCR5, then CXCR4 and CXCR3 increased as old aged TC<sup>-</sup>ATA B tumor. TC<sup>+</sup>ZAP70<sup>-</sup>CD5<sup>+</sup> cells are continuously CXCR5<sup>+</sup> and low CXCR4 and CXCR3. TC<sup>+</sup>ZAP70<sup>+</sup>CD5<sup>+</sup> cells are lower CXCR5 but low CXCR4 and slightly increased CXCR3. CCR7 is slightly higher by old aged TC<sup>-</sup> cells than TC<sup>+</sup>. **(B)** 2 mo WT B cells compared with TC<sup>-</sup>ZAP70<sup>-</sup>CD5<sup>-</sup> versus TC<sup>+</sup>ZAP70<sup>-</sup>CD5<sup>+</sup> in listed Figure 4A1,3. 2 mo WT CD38, CD43, CD44, STAT3, BAFF are higher in pB1a, and old age TC<sup>-</sup>ATA B are more increased than middle aged TC<sup>+</sup>, but TC<sup>+</sup>ZAP70<sup>+</sup>CD5<sup>+</sup> increased for CD44 and STAT3 (Figure 4B2). TC<sup>+</sup> in CD21, CD23. CD24, CD27, CD49d are higher than TC<sup>-</sup>. In 2 mo WT B1a cells, CD21 negative and CD23 low originally, and low in TC<sup>-</sup> and TC<sup>+</sup>ZAP70<sup>+</sup>CD5<sup>+</sup> also low. CD49d showed higher in original pB1a, then all CD24, CD27, CD49d were low in old aged TC<sup>-</sup>ATA B tumor (both ZAP70<sup>-</sup> and ZAP70<sup>+</sup>) than TC<sup>+</sup>. Since CD27 is generally lower in all B cells in mice (not human) TC<sup>+</sup>Tg slightly increased. CD49d and CD24 down are old aged TC<sup>-</sup>ATA B tumor. In APRIL, 2 mo WT showed higher in pB1a and TC<sup>-</sup>CD5<sup>-</sup> showed decreased at 12 mo and also low in old aged TC<sup>-</sup>ATA B tumor, compared to increased BAFF. **(C)** 2 mo WT, CD22 and Arid5a are FOB > B1a, and Hamp2 are FOB < B1a. Then, 12 mo TC<sup>-</sup>CD5<sup>-</sup> cells showed similar to old aged TC<sup>-</sup>ATA B tumor than middle aged TC<sup>+</sup>ZAP70<sup>-</sup>CD5<sup>+</sup> cells (Figure 5C) and also TC<sup>+</sup>ZAP70<sup>+</sup>CD5<sup>+</sup> cells. Clearly, high CD22R and Arid5a, and higher Hamp2, USF2<sup>+</sup>, and IL-22R<sup>+</sup> in TC<sup>-</sup> than TC<sup>+</sup>(ZAP70<sup>-</sup> and ZAP70<sup>+</sup>). Thus, not Hamp2 increased in TC<sup>+</sup>Tg mice.
