# Supplementary material for: B-1 derived anti-Thy-1 B cells in old aged mice develop lymphoma/leukemia with high expression of CD11b and Hamp2 that different from TCL1 transgenic mice
Source: PubMed Central journal article supplement (PMC10988983; doi:10.1186/s12979-024-00415-6), 2024-04-03
Supplement: 12979_2024_415_MOESM3_ESM.pdf [file 12979_2024_415_MOESM3_ESM.pdf]

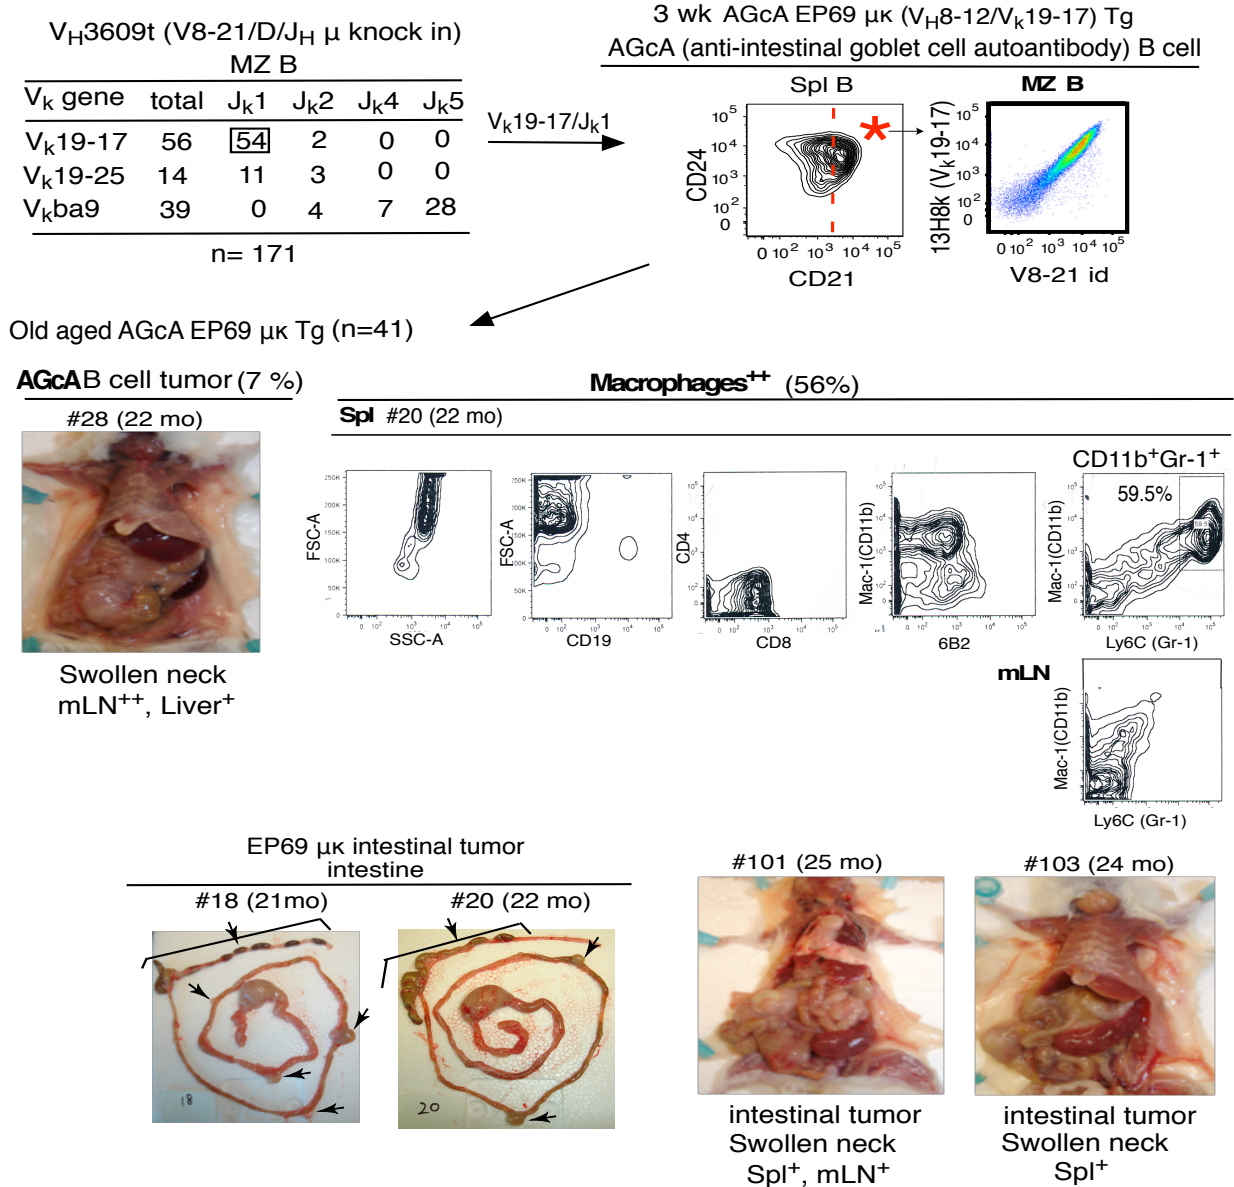

**Figure S3. AGcA generation of NZ B and old aged generation of macrophages<sup>++</sup> and intestinal tumor.** Summary of V<sub>H</sub>3609t (V8-12/D/J<sub>H</sub> knock in) in MZ B cells with higher V<sub>k</sub>19-17/J<sub>k</sub>1. V8-12/V<sub>k</sub>19-17 B cell is the AGcA (a natural anti-intestinal goblet cell autoantibody), and AGcA  $\mu$ kTg (EP69  $\mu$ kTg) generate higher MZ B cells with V8-12/V<sub>k</sub>19-17 (1). In this EP69  $\mu$ kTg mice, old aged 7% generated AGcA B cell tumor (mLN<sup>+</sup>, Liver<sup>+</sup>), and 56% by Macrophage<sup>++</sup> (CD11b<sup>+</sup>Gr-1<sup>+</sup>) higher in spleen with probably increased iron, with intestinal tumor generation as seen in small intestine (not high macrophage) and more in large intestine (colon). Also, a swollen lymph node increase with in neck.

1. Ichikawa, D., Asano, A., Shinton, S.A., Brill-Dashoff, J., Formica, A.M., Velcich, A., Hardy, R.R., and Hayakawa K. (2015). Natural anti-intestinal goblet cell autoantibody production from Marginal zone B cells. *J. Immunol.* 194:606.
